# Supplementary material for: ASGART: fast and parallel genome scale segmental duplications mapping
Source: Oxford University Press journal article supplement (doi:10.1093/bioinformatics/bty172), 2018-03-20
Supplement: bioinformatics_34_16_2708_s1.zip [file bioinformatics_34_16_2708_s1.zip]

Supplementary Figure 1: SD mapping of *Mus musculus*  $\geq 10$ kbp

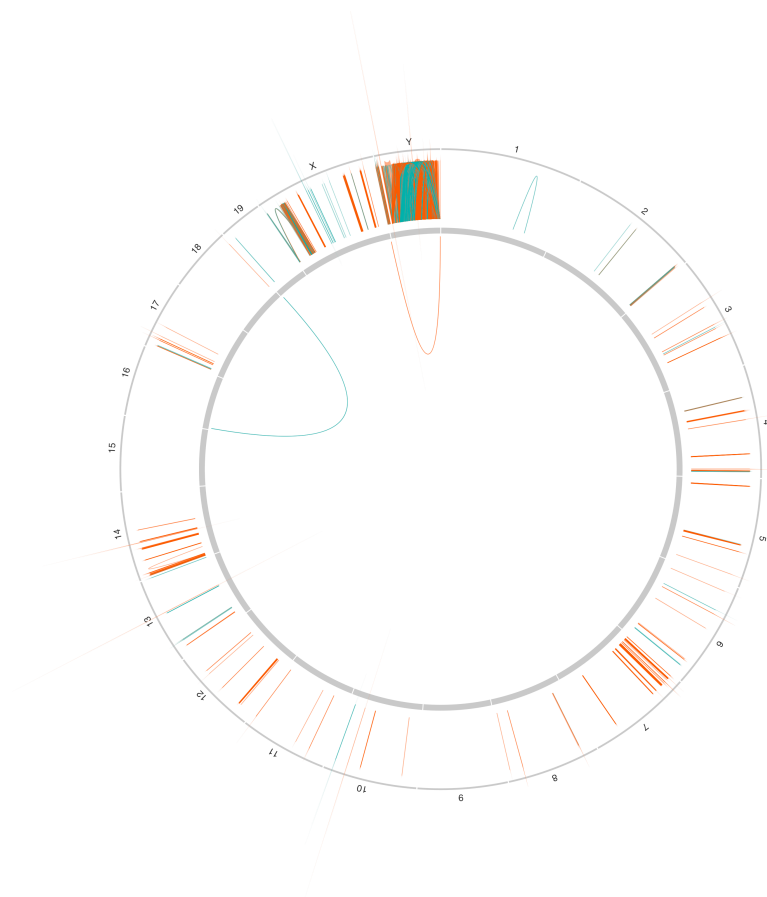

Supplementary Figure 2: SD mapping of *Danio rerio*  $\geq 10\text{kbp}$

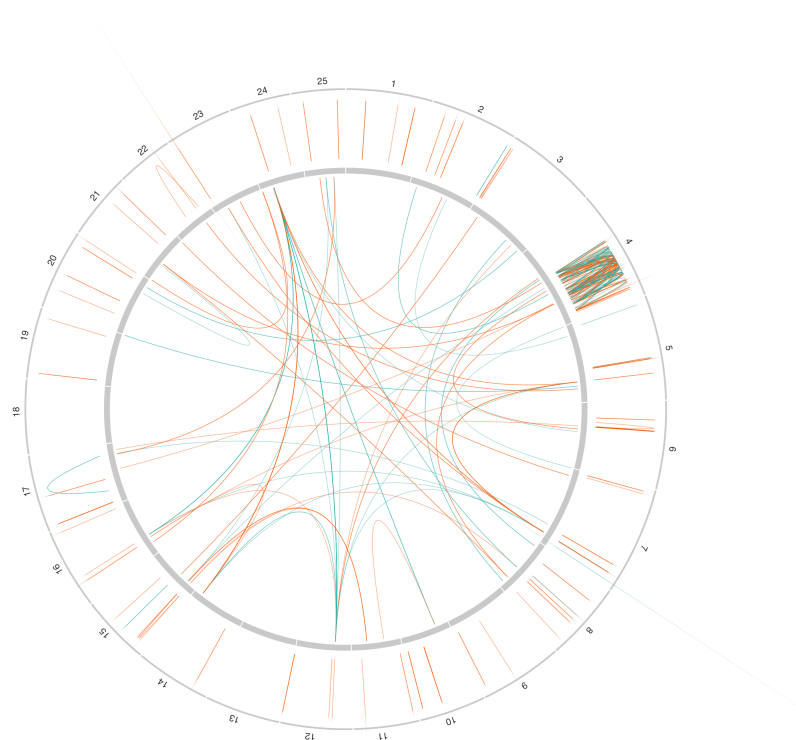

Supplementary Figure 3: SD mapping of *Drosophila melanogaster*  $\geq 5\text{kbp}$

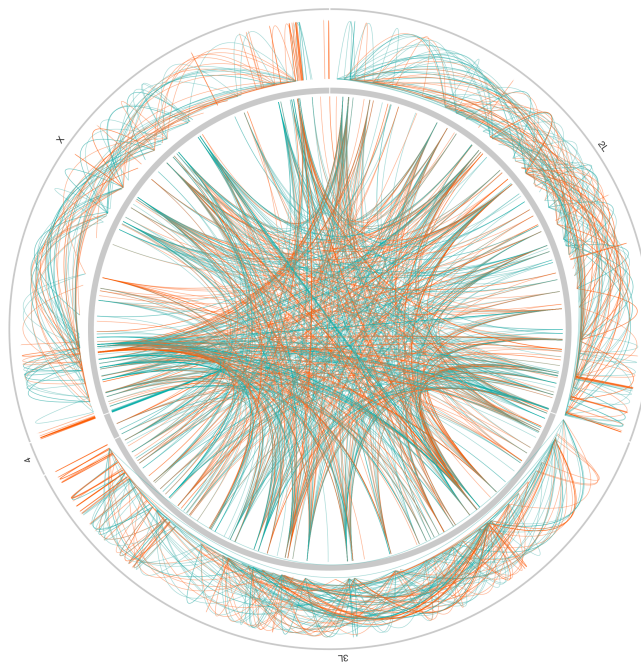

**Supplementary Figure 4: SD mapping of *Arabidopsis thaliana*  $\geq 5$  kbp**

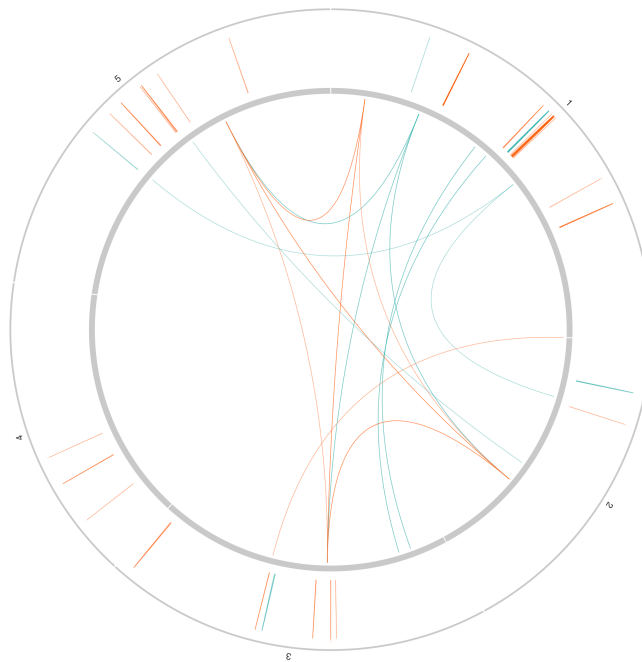

### DNA generator pseudocode

```
dna = rand(['A', 'T', 'G', 'C']) * STRAND_LENGTH

for i in (0..SD_count)
  length = rand(MIN_LENGTH..MAX_LENGTH)
  first_arm = rand(['A', 'T', 'G', 'C']) * length

  count = rand(1..MAX_SD_REPETITIONS)
  arms = [first_arm]
  for j in (0..count)
    arms << fuzzy(first_arm, identity_rate)
  end

  for arm in arms
    if rand() < INDEL_PROBABILITY
      if rand() > 0.5 then
        add_insertion(arm)
      else
        add_deletion(arm)
      end
    end
  end

  position =
    get_random_non_overlapping_position()
  dna[position] = arm
end
end
```
